# Supplementary material
Source: PubMed Central journal article supplement (PMC5083135)
Supplement: NIHMS812652-supplement-2.pdf [file NIHMS812652-supplement-2.pdf]

**Supplementary Table 1: GWAS loci with functional outside variants**

| <b>Lead SNP</b> | <b>Gene Target</b> | <b>Regulatory Circuitry</b> |
|-----------------|--------------------|-----------------------------|
| rs10201872      | SP100              | PreSTIGE                    |
| rs10488631      | IRF5               | Hi-C                        |
| rs1077667       | C3                 | Super                       |
| rs1077667       | GPR108             | Super                       |
| rs10892279      | TRAPPC4            | Hi-C                        |
| rs10892279      | UPK2               | Hi-C                        |
| rs10995271      | ADO                | Hi-C                        |
| rs11150589      | SEPHS2             | Super                       |
| rs11175593      | LRRK2              | PreSTIGE                    |
| rs11203203      | RSPH1              | Hi-C, Super                 |
| rs11203203      | TMPRSS3            | Hi-C, Super                 |
| rs11755724      | RREB1              | Hi-C                        |
| rs11860650      | ITGAD              | PreSTIGE                    |
| rs12025416      | ATP1A1OS           | PreSTIGE                    |
| rs12456021      | ALPK2              | Super                       |
| rs12531711      | IRF5               | Hi-C                        |
| rs12711490      | IRF8               | Super                       |
| rs12928822      | RMI2               | Super                       |
| rs13239597      | IRF5               | Hi-C                        |
| rs13277113      | FAM167A            | Super                       |
| rs13333054      | IRF8               | Super                       |
| rs1335532       | ATP1A1OS           | PreSTIGE                    |
| rs13428812      | DNMT3A             | Super                       |
| rs16940202      | IRF8               | PreSTIGE                    |
| rs1738074       | RSPH3              | Hi-C                        |
| rs17445836      | IRF8               | Super                       |
| rs17810546      | IL12A              | Hi-C                        |
| rs2176082       | PXK                | Super                       |
| rs2283792       | YPEL1              | Super                       |
| rs2284553       | IL10RB             | Hi-C                        |
| rs2297441       | C20orf195          | Super                       |
| rs2300747       | ATP1A1OS           | PreSTIGE                    |
| rs2413583       | PDGFB              | Super                       |
| rs2413583       | SYNGR1             | Super                       |
| rs2425752       | NCOA5              | Hi-C, Super                 |
| rs2431697       | C5orf54            | Super                       |
| rs2762051       | DLEU1              | Hi-C                        |
| rs290986        | SYK                | PreSTIGE, Hi-C, Super       |
| rs3024493       | DYRK3              | Hi-C                        |
| rs3024493       | FAIM3              | Hi-C                        |
| rs3024493       | IL19               | PreSTIGE, Hi-C, Super       |
| rs3024505       | DYRK3              | Hi-C                        |
| rs3024505       | IL19               | PreSTIGE, Hi-C, Super       |
| rs354033        | ZNF767             | Super                       |

(Continued)

| <b>Lead SNP</b> | <b>Gene Target</b> | <b>Regulatory Circuitry</b> |
|-----------------|--------------------|-----------------------------|
| rs4308217       | ILDR1              | Super                       |
| rs4656940       | CD244              | PreSTIGE, Hi-C              |
| rs4656940       | CD48               | Super                       |
| rs4656940       | LY9                | PreSTIGE, Hi-C, Super       |
| rs4656940       | SLAMF7             | PreSTIGE, Super             |
| rs4680534       | IL12A              | Hi-C                        |
| rs4780355       | RMI2               | Super                       |
| rs4781011       | CLEC16A            | Hi-C                        |
| rs4781011       | DEXI               | Super                       |
| rs4781011       | FAM18A             | PreSTIGE                    |
| rs4810485       | CD40               | Super                       |
| rs4810485       | NCOA5              | Hi-C                        |
| rs4953911       | MGAT5              | Super                       |
| rs6074022       | CD40               | Super                       |
| rs6074022       | NCOA5              | Hi-C                        |
| rs615672        | HLA-DQA1           | Super                       |
| rs615672        | HLA-DQB1           | Super                       |
| rs615672        | HLA-DRB1           | Super                       |
| rs630923        | TRAPPC4            | Hi-C                        |
| rs630923        | UPK2               | Hi-C                        |
| rs6445975       | PXK                | Super                       |
| rs6498169       | CIITA              | Super                       |
| rs6498169       | DEXI               | Super                       |
| rs660895        | HLA-DQA1           | PreSTIGE, Super             |
| rs660895        | HLA-DQB1           | Super                       |
| rs660895        | HLA-DRB5           | PreSTIGE, Super             |
| rs660895        | HLA-DRB6           | PreSTIGE, Super             |
| rs6716753       | SP100              | PreSTIGE                    |
| rs7155603       | FLVCR2             | Super                       |
| rs7172677       | C15orf39           | Super                       |
| rs7200786       | SOCS1              | Super                       |
| rs7238078       | ALPK2              | Super                       |
| rs7238078       | MALT1              | PreSTIGE, Hi-C, Super       |
| rs7253363       | ELOF1              | Super                       |
| rs7423615       | SP100              | PreSTIGE                    |
| rs7923837       | KIF11              | Super                       |
| rs806321        | DLEU1              | Hi-C                        |
| rs874040        | C4orf52            | Hi-C                        |
| rs907611        | SYT8               | Super                       |
| rs9596270       | DLEU1              | Hi-C                        |
| rs960709        | ANXA6              | Hi-C, Super                 |
| rs960709        | GM2A               | Hi-C                        |
| rs9888739       | ITGAD              | PreSTIGE                    |

**Supplementary Table 2: Outside variant loci evaluated in luciferase reporter assays**

| Enhancer region (hg18)       | Gene Target(s) | Functional Outside Variants              | Primer sequences |                                           |
|------------------------------|----------------|------------------------------------------|------------------|-------------------------------------------|
| chr9:92,597,336-92,599,537   | SYK            | rs10993693, rs290997                     | FWD              | <b>GGAGACAUGATCTTGGTATGAGAAAACCATCT</b>   |
|                              |                |                                          | REV              | <b>GGGAAAGUGCGCAGATTTAGATCTTCATTCA</b>    |
| chr16:84,546,145-84,547,502  | IRF8           | rs7199472                                | FWD              | <b>GGAGACAUGGAGGTGACTTCTGCATTGA</b>       |
|                              |                |                                          | REV              | <b>GGGAAAGUCGGTACAAAGGCCTGAGGT</b>        |
| chr1:159,025,419-159,027,509 | SLAMF7, LY9    | rs1333065, rs12405457                    | FWD              | <b>GGAGACAUCAGAACCTGTCCCCTCATCA</b>       |
|                              |                |                                          | REV              | <b>GGGAAAGUGCTGAACTGAACTTAAGGCTGA</b>     |
| chr18:54,380,385-54,381,923  | MALT1          | rs8090585                                | FWD              | <b>GGAGACAUGGAGGTGACTTCTGCATTGA</b>       |
|                              |                |                                          | REV              | <b>GGGAAAGUCGGTACAAAGGCCTGAGGT</b>        |
| chr2:230,891,662-230,892,865 | SP100          | rs11679076                               | FWD              | <b>GGAGACAUCAGGATTCGATACCATCACTCA</b>     |
|                              |                |                                          | REV              | <b>GGGAAAGUGAAAACCTCATCCATCTCATCTGC</b>   |
| chr6:32,683,356-32,684,808   | HLA-DQA1       | rs646984                                 | FWD              | <b>GGAGACAUCCCATCGTCTAAAACATGCAC</b>      |
|                              |                |                                          | REV              | <b>GGGAAAGUCCAAAACCTTGCCCTTTTTAATG</b>    |
| chr12:38,848,086-38,849,374  | LRRK2          | rs728624, rs728623, rs2708489, rs1948380 | FWD              | <b>GGAGACAUTTGTGTCAGTAATCATTTATCTGCAT</b> |
|                              |                |                                          | REV              | <b>GGGAAAGUTGAGATATGAAAAATAGTTTCAGCAA</b> |

**Supplementary Table 3: Summary of candidate “third SNPs” evaluated**

|           |                               |                       | "3rd" SNPs with effects: Independent effect on expression, no additional variance explained by GWAS or outside variant |                    |                      | "3rd" SNP with effects that are imputed on GWAS panel |                    |                      |
|-----------|-------------------------------|-----------------------|------------------------------------------------------------------------------------------------------------------------|--------------------|----------------------|-------------------------------------------------------|--------------------|----------------------|
| Gene      | Candidate "3rd" SNPs per gene | Number tests per gene | P<7.5E-8 (uncorrected)                                                                                                 | P<0.05 (corrected) | P<5E-3 (uncorrected) | P<7.5E-8 (uncorrected)                                | P<0.05 (corrected) | P<5E-3 (uncorrected) |
| ADO       | 3094                          | 5638                  | 16                                                                                                                     | 61                 | 116                  | 8                                                     | 20                 | 50                   |
| ALPK2     | 3489                          | 7275                  | 0                                                                                                                      | 0                  | 15                   | NA                                                    | NA                 | 15                   |
| ATP1A1OS  | 2396                          | 3806                  | 0                                                                                                                      | 1                  | 1                    | NA                                                    | 1                  | 1                    |
| C20orf195 | 4680                          | 8976                  | 0                                                                                                                      | 0                  | 14                   | NA                                                    | NA                 | 6                    |
| C3        | 4823                          | 9289                  | 0                                                                                                                      | 0                  | 47                   | NA                                                    | NA                 | 5                    |
| C4orf52   | 3064                          | 5928                  | 15                                                                                                                     | 15                 | 15                   | 15                                                    | 15                 | 15                   |
| CD244     | 3359                          | 6147                  | 11                                                                                                                     | 11                 | 11                   | 11                                                    | 11                 | 11                   |
| CD40      | 3292                          | 6160                  | 0                                                                                                                      | 0                  | 20                   | NA                                                    | NA                 | 3                    |
| CD48      | 2897                          | 5245                  | 0                                                                                                                      | 3                  | 29                   | NA                                                    | 3                  | 29                   |
| CIITA     | 3827                          | 7729                  | 0                                                                                                                      | 0                  | 11                   | NA                                                    | NA                 | 10                   |
| CLEC16A   | 4115                          | 8417                  | 0                                                                                                                      | 0                  | 55                   | NA                                                    | NA                 | 49                   |
| DEXI      | 4101                          | 8387                  | 2                                                                                                                      | 30                 | 121                  | 2                                                     | 30                 | 121                  |
| DLEU1     | 3113                          | 5821                  | 0                                                                                                                      | 80                 | 89                   | NA                                                    | 80                 | 89                   |
| DNMT3A    | 2859                          | 5307                  | 0                                                                                                                      | 0                  | 26                   | NA                                                    | NA                 | 5                    |
| DYRK3     | 1771                          | 3143                  | 0                                                                                                                      | 0                  | 15                   | NA                                                    | NA                 | 14                   |
| ELOF1     | 3546                          | 6010                  | 0                                                                                                                      | 0                  | 49                   | NA                                                    | NA                 | 21                   |
| FAIM3     | 2352                          | 4416                  | 0                                                                                                                      | 0                  | 3                    | NA                                                    | NA                 | 1                    |
| FAM18A    | 3829                          | 7553                  | 0                                                                                                                      | 0                  | 36                   | NA                                                    | NA                 | 5                    |
| FLVCR2    | 2783                          | 5221                  | 0                                                                                                                      | 0                  | 3                    | NA                                                    | NA                 | *                    |
| GPR108    | 4875                          | 9459                  | 12                                                                                                                     | 15                 | 116                  | 12                                                    | 15                 | 111                  |
| HLA-DQA1  | 22081                         | 53643                 | 30                                                                                                                     | 30                 | 30                   | 30                                                    | 30                 | 30                   |
| HLA-DQB1  | 22346                         | 54378                 | 0                                                                                                                      | 0                  | 0                    | NA                                                    | NA                 | NA                   |
| HLA-DRB1  | 21533                         | 52289                 | 0                                                                                                                      | 0                  | 0                    | NA                                                    | NA                 | NA                   |
| HLA-DRB5  | 20633                         | 49967                 | 237                                                                                                                    | 390                | 1377                 | 111                                                   | 214                | 668                  |
| HLA-DRB6  | 20865                         | 50545                 | 10                                                                                                                     | 10                 | 10                   | 10                                                    | 10                 | 10                   |
| IL10RB    | 2735                          | 5805                  | 0                                                                                                                      | 1                  | 51                   | NA                                                    | 1                  | 45                   |
| IL12A     | 2703                          | 4451                  | 32                                                                                                                     | 33                 | 33                   | 32                                                    | 33                 | 33                   |
| IL19      | 2286                          | 4304                  | 0                                                                                                                      | 0                  | 0                    | NA                                                    | NA                 | NA                   |
| ILDR1     | 2951                          | 5931                  | 0                                                                                                                      | 0                  | 13                   | NA                                                    | NA                 | 3                    |
| IRF5      | 3305                          | 6393                  | 13                                                                                                                     | 18                 | 20                   | 13                                                    | 18                 | 20                   |
| IRF8      | 4764                          | 9180                  | 0                                                                                                                      | 0                  | 13                   | NA                                                    | NA                 | 8                    |
| KIF11     | 2579                          | 4495                  | 0                                                                                                                      | 0                  | 144                  | NA                                                    | NA                 | 11                   |
| LRRK2     | 3431                          | 6717                  | 0                                                                                                                      | 1                  | 60                   | NA                                                    | 1                  | 54                   |
| LY9       | 3060                          | 5556                  | 0                                                                                                                      | 10                 | 11                   | NA                                                    | 10                 | 11                   |
| MALT1     | 3473                          | 7217                  | 0                                                                                                                      | 0                  | 6                    | NA                                                    | NA                 | 5                    |
| MGAT5     | 3212                          | 6454                  | 0                                                                                                                      | 0                  | 41                   | NA                                                    | NA                 | 2                    |
| NCOA5     | 3230                          | 5904                  | 0                                                                                                                      | 0                  | 12                   | NA                                                    | NA                 | 7                    |
| PDGFB     | 3300                          | 6724                  | 10                                                                                                                     | 32                 | 32                   | 10                                                    | 32                 | 32                   |
| RMI2      | 4124                          | 8710                  | 0                                                                                                                      | 0                  | 0                    | NA                                                    | NA                 | NA                   |

**Supplementary Table 3: Summary of candidate “third SNPs” evaluated (continued)**

| Gene     | Candidate "3rd" SNPs per gene | Number tests per gene | "3rd" SNPs with effects: Independent effect on expression, no additional variance explained by GWAS or outside variant |                    |                      | "3rd" SNP with effects that are imputed on GWAS panel |                    |                      |
|----------|-------------------------------|-----------------------|------------------------------------------------------------------------------------------------------------------------|--------------------|----------------------|-------------------------------------------------------|--------------------|----------------------|
|          |                               |                       | P<7.5E-8 (uncorrected)                                                                                                 | P<0.05 (corrected) | P<5E-3 (uncorrected) | P<7.5E-8 (uncorrected)                                | P<0.05 (corrected) | P<5E-3 (uncorrected) |
| RREB1    | 4184                          | 8352                  | 0                                                                                                                      | 0                  | 9                    | NA                                                    | NA                 | 2                    |
| RSPH1    | 4852                          | 9082                  | 0                                                                                                                      | 0                  | 0                    | NA                                                    | NA                 | NA                   |
| RSPH3    | 3806                          | 7802                  | 143                                                                                                                    | 171                | 204                  | 125                                                   | 150                | 166                  |
| SEPHS2   | 1291                          | 2363                  | 0                                                                                                                      | 6                  | 8                    | NA                                                    | 6                  | 8                    |
| SLAMF7   | 3053                          | 5595                  | 4                                                                                                                      | 8                  | 8                    | 4                                                     | 8                  | 8                    |
| SOCS1    | 3990                          | 8212                  | 0                                                                                                                      | 0                  | 31                   | NA                                                    | NA                 | 31                   |
| SP100    | 3425                          | 7299                  | 0                                                                                                                      | 0                  | 6                    | NA                                                    | NA                 | 3                    |
| SYK      | 3953                          | 7381                  | 0                                                                                                                      | 0                  | 0                    | NA                                                    | NA                 | NA                   |
| SYNGR1   | 3172                          | 6404                  | 0                                                                                                                      | 0                  | 0                    | NA                                                    | NA                 | NA                   |
| SYT8     | 4991                          | 10399                 | 0                                                                                                                      | 0                  | 15                   | NA                                                    | NA                 | 14                   |
| TMPRSS3  | 4898                          | 9394                  | 0                                                                                                                      | 0                  | 25                   | NA                                                    | NA                 | 15                   |
| TRAPPC4  | 2488                          | 5352                  | 36                                                                                                                     | 36                 | 36                   | 36                                                    | 36                 | 36                   |
| UPK2     | 2415                          | 5133                  | 0                                                                                                                      | 0                  | 0                    | NA                                                    | NA                 | NA                   |
| YPEL1    | 2986                          | 5942                  | 0                                                                                                                      | 0                  | 78                   | NA                                                    | NA                 | 6                    |
| ZNF767   | 3676                          | 7272                  | 0                                                                                                                      | 14                 | 15                   | NA                                                    | 7                  | 7                    |
| ANXA6    | 3595                          | 7191                  | 0                                                                                                                      | 0                  | 0                    | Lupus or Celiac                                       | Lupus or Celiac    | Lupus or Celiac      |
| C15orf39 | 2018                          | 3906                  | 0                                                                                                                      | 43                 | 61                   | Lupus or Celiac                                       | Lupus or Celiac    | Lupus or Celiac      |
| C5orf54  | 3451                          | 6671                  | 0                                                                                                                      | 0                  | 24                   | Lupus or Celiac                                       | Lupus or Celiac    | Lupus or Celiac      |
| FAM167A  | 4904                          | 10348                 | 59                                                                                                                     | 59                 | 59                   | Lupus or Celiac                                       | Lupus or Celiac    | Lupus or Celiac      |
| GM2A     | 3627                          | 7237                  | 8                                                                                                                      | 8                  | 8                    | Lupus or Celiac                                       | Lupus or Celiac    | Lupus or Celiac      |
| ITGAD    | 2129                          | 4297                  | 2                                                                                                                      | 6                  | 11                   | Lupus or Celiac                                       | Lupus or Celiac    | Lupus or Celiac      |
| PXK      | 2847                          | 5551                  | 0                                                                                                                      | 1                  | 140                  | Lupus or Celiac                                       | Lupus or Celiac    | Lupus or Celiac      |

\* gene excluded from percentage calculations

NOTE: only loci associated with RA, MS, UC and CD were evaluated for impact on clinical risk
